# Supplementary material for: Neuroprotection of Truncated Peptide IIAVE from Isochrysis zhanjiangensis: Quantum Chemical, Molecular Docking, and Bioactivity Studies
Source: MDPI journal article supplement (doi:10.3390/molecules29030692), 2024-02-02
Supplement: s1 [file s1]

Table S1. Optimized atomic coordinates.

| Coordinates (Å) |      |           |           |           | Coordinates (Å) |      |           |           |           |
|-----------------|------|-----------|-----------|-----------|-----------------|------|-----------|-----------|-----------|
| NO.             | Atom | X         | Y         | Z         | NO.             | Atom | X         | Y         | Z         |
| 1               | C    | -4.398246 | -0.43367  | 1.279267  | 43              | H    | -4.883465 | 1.225117  | -2.548198 |
| 2               | O    | -5.343018 | -0.838839 | 1.955921  | 44              | H    | -6.178445 | 0.038354  | -2.402376 |
| 3               | N    | -4.99506  | -1.528542 | -0.796558 | 45              | H    | -7.102654 | 2.031045  | -3.461408 |
| 4               | C    | -4.532332 | -0.244359 | -0.236505 | 46              | H    | -7.805393 | 1.90334   | -1.840646 |
| 5               | C    | -5.552798 | 0.884138  | -0.518941 | 47              | H    | -6.523536 | 3.081007  | -2.164059 |
| 6               | C    | -5.827683 | 1.006621  | -2.027724 | 48              | H    | -5.81787  | 2.99522   | -0.02493  |
| 7               | C    | -6.87096  | 2.068028  | -2.391243 | 49              | H    | -4.846151 | 2.114751  | 1.151384  |
| 8               | C    | -5.064719 | 2.209842  | 0.082205  | 50              | H    | -4.152063 | 2.554392  | -0.420557 |
| 9               | C    | -1.302843 | -0.435145 | 0.229678  | 51              | H    | -3.206272 | -0.24514  | 2.871094  |
| 10              | O    | -0.576996 | 0.088771  | -0.630026 | 52              | H    | -2.321982 | 1.355555  | 0.695068  |
| 11              | N    | -3.192493 | -0.158175 | 1.860788  | 53              | H    | -1.711755 | 1.468678  | 3.106715  |
| 12              | C    | -2.016131 | 0.468458  | 1.256857  | 54              | H    | 0.621851  | 1.478605  | 1.153013  |
| 13              | C    | -1.063109 | 0.943575  | 2.389911  | 55              | H    | -0.587446 | 2.738121  | 1.293527  |
| 14              | C    | -0.046108 | 1.970411  | 1.861384  | 56              | H    | 1.449123  | 3.402207  | 2.515455  |
| 15              | C    | 0.786651  | 2.647093  | 2.952831  | 57              | H    | 0.147233  | 3.142759  | 3.693893  |
| 16              | C    | -0.389821 | -0.23323  | 3.111327  | 58              | H    | 1.419773  | 1.928519  | 3.483882  |
| 17              | C    | 0.663626  | -2.757762 | -0.55509  | 59              | H    | 0.154317  | 0.115561  | 3.99335   |
| 18              | O    | 1.282612  | -2.375533 | -1.649036 | 60              | H    | -1.121799 | -0.973138 | 3.454973  |
| 19              | N    | -1.519527 | -1.754234 | 0.337144  | 61              | H    | 0.315284  | -0.748267 | 2.448871  |
| 20              | C    | -0.846977 | -2.837155 | -0.465966 | 62              | H    | -2.091858 | -2.046566 | 1.119323  |
| 21              | C    | -1.483279 | -2.915181 | -1.852819 | 63              | H    | -1.124201 | -3.732557 | 0.109774  |
| 22              | C    | 3.198844  | -1.11647  | 0.003825  | 64              | H    | -1.060128 | -3.751927 | -2.41585  |
| 23              | O    | 4.318568  | -0.980623 | -0.500648 | 65              | H    | -2.566364 | -3.051904 | -1.775132 |
| 24              | N    | 1.280205  | -2.442832 | 0.717181  | 66              | H    | -1.27966  | -1.995485 | -2.405468 |
| 25              | C    | 2.74153   | -2.385588 | 0.75034   | 67              | H    | 0.918581  | -3.032217 | 1.462102  |
| 26              | C    | 3.504796  | -3.652453 | 0.273144  | 68              | H    | 3.00444   | -2.224737 | 1.80681   |
| 27              | C    | 4.936521  | -3.670155 | 0.825559  | 69              | H    | 3.542664  | -3.618042 | -0.820622 |
| 28              | C    | 2.762491  | -4.927756 | 0.689141  | 70              | H    | 5.480439  | -4.552511 | 0.466446  |
| 29              | C    | 2.737468  | 0.681689  | -2.309916 | 71              | H    | 5.483601  | -2.775319 | 0.523744  |
| 30              | O    | 3.422618  | 1.426663  | -3.00374  | 72              | H    | 4.923376  | -3.715165 | 1.923478  |
| 31              | N    | 2.270929  | -0.128371 | -0.007518 | 73              | H    | 3.327623  | -5.814602 | 0.378867  |
| 32              | C    | 2.393142  | 1.042949  | -0.854626 | 74              | H    | 1.770649  | -4.971341 | 0.228278  |
| 33              | C    | 3.314383  | 2.1045    | -0.242403 | 75              | H    | 2.641517  | -4.978611 | 1.779906  |
| 34              | C    | 3.065091  | 3.50894   | -0.792215 | 76              | H    | 1.326455  | -0.429075 | 0.206584  |
| 35              | C    | 3.635205  | 4.590897  | 0.09274   | 77              | H    | 1.376769  | 1.450183  | -0.904697 |
| 36              | O    | 3.861814  | 4.494519  | 1.284322  | 78              | H    | 3.127279  | 2.112529  | 0.834857  |
| 37              | O    | 3.846885  | 5.738794  | -0.588997 | 79              | H    | 4.359306  | 1.815971  | -0.388039 |
| 38              | O    | 2.184377  | -0.403379 | -2.80872  | 80              | H    | 3.449756  | 3.616287  | -1.807508 |
| 39              | H    | -4.836638 | -1.513683 | -1.80238  | 81              | H    | 1.983475  | 3.703892  | -0.85056  |
| 40              | H    | -4.395537 | -2.276007 | -0.447866 | 82              | H    | 4.170748  | 6.398038  | 0.055047  |

| Coordinates (Å) |      |           |          |           | Coordinates (Å) |      |          |           |           |
|-----------------|------|-----------|----------|-----------|-----------------|------|----------|-----------|-----------|
| NO.             | Atom | X         | Y        | Z         | NO.             | Atom | X        | Y         | Z         |
| 41              | H    | -3.56988  | 0.064164 | -0.665229 | 83              | H    | 1.722828 | -1.105151 | -2.144821 |
| 42              | H    | -6.485694 | 0.589956 | -0.020546 | -               | -    | -        | -         | -         |

**Table S2.** The natural population of the IIAVE.

| NO. | Atom | Charge  | NO. | Atom | Charge  | NO. | Atom | Charge |
|-----|------|---------|-----|------|---------|-----|------|--------|
| 1   | C    | 0.6998  | 29  | C    | 0.7916  | 57  | H    | 0.2240 |
| 2   | O    | -0.6557 | 30  | O    | -0.6629 | 58  | H    | 0.2248 |
| 3   | N    | -0.9202 | 31  | N    | -0.6742 | 59  | H    | 0.2460 |
| 4   | C    | -0.1432 | 32  | C    | -0.1791 | 60  | H    | 0.2243 |
| 5   | C    | -0.2582 | 33  | C    | -0.4638 | 61  | H    | 0.2178 |
| 6   | C    | -0.4623 | 34  | C    | -0.5630 | 62  | H    | 0.4316 |
| 7   | C    | -0.6807 | 35  | C    | 0.7825  | 63  | H    | 0.2536 |
| 8   | C    | -0.6916 | 36  | O    | -0.6809 | 64  | H    | 0.2408 |
| 9   | C    | 0.6036  | 37  | O    | -0.7266 | 65  | H    | 0.2252 |
| 10  | O    | -0.6956 | 38  | O    | -0.7480 | 66  | H    | 0.2378 |
| 11  | N    | -0.6692 | 39  | H    | 0.3939  | 67  | H    | 0.4250 |
| 12  | C    | -0.1363 | 40  | H    | 0.3875  | 68  | H    | 0.2604 |
| 13  | C    | -0.2578 | 41  | H    | 0.2317  | 69  | H    | 0.2496 |
| 14  | C    | -0.4622 | 42  | H    | 0.2459  | 70  | H    | 0.2279 |
| 15  | C    | -0.6831 | 43  | H    | 0.2310  | 71  | H    | 0.2417 |
| 16  | C    | -0.6785 | 44  | H    | 0.2352  | 72  | H    | 0.2220 |
| 17  | C    | 0.5797  | 45  | H    | 0.2373  | 73  | H    | 0.2340 |
| 18  | O    | -0.7361 | 46  | H    | 0.2285  | 74  | H    | 0.2358 |
| 19  | N    | -0.6851 | 47  | H    | 0.2288  | 75  | H    | 0.2229 |
| 20  | C    | -0.1383 | 48  | H    | 0.2422  | 76  | H    | 0.4559 |
| 21  | C    | -0.6798 | 49  | H    | 0.2371  | 77  | H    | 0.2605 |
| 22  | C    | 0.6720  | 50  | H    | 0.2267  | 78  | H    | 0.2478 |
| 23  | O    | -0.6914 | 51  | H    | 0.4275  | 79  | H    | 0.2462 |
| 24  | N    | -0.6797 | 52  | H    | 0.2545  | 80  | H    | 0.2556 |
| 25  | C    | -0.1434 | 53  | H    | 0.2461  | 81  | H    | 0.2416 |
| 26  | C    | -0.2643 | 54  | H    | 0.2423  | 82  | H    | 0.4998 |
| 27  | C    | -0.6801 | 55  | H    | 0.2344  | 83  | H    | 0.5192 |
| 28  | C    | -0.6800 | 56  | H    | 0.2397  | -   | -    | -      |
